# Supplementary material
Source: publisher figshare collection journal article supplement (https://gsapubs.figshare.com/ndownloader/files/24994757)
Supplement: Supplementary file 1 [file 24994757]

## Sheet: TABLE S1
TABLE S1. MAIN MINERAL COMPONENTS AND MODAL CONTENTS (VOL%) OF REPRESENTATIVE SAMPLES
Sample	Location (GPS)	Grt	Cpx	Opx	Hbl	Bt	Pl	Kfs	Qz	Others
Mafic granulite
18AK98	92°24′06.26″E 39°11′37.16″N	20	22	8	26	–	20	–	3	Ilm, Zrn, Ap
18AK100	92°24′04.67″E 39°11′39.72″N	28	–	29	11	–	24	–	7	Ilm, Zrn
18AK104	92°24′05.92″E 39°11′45.05″N	21	50	1	12	–	12	–	3	Ilm, Zrn, Ap
Paragneissic granulite
AK34	91°44′02.40″E 39°11′42.93″N	30	–	17	–	12	27	1	12	Ilm, Zrn, Mnz
18AK86	92°42′37.57″E 39°15′18.05″N	22	–	5	–	21	24	15	12	Ilm, Zrn, Mnz
18AK101	92°24′06.61″E 39°11′40.41″N	18	3	10	9	29	27	0.5	3	Ilm, Zrn, Ap, Mag
Grt-Cpx amphibolite
18AK118	92°20′44.18″E 39°14′17.64″N	25	12	–	48	–	11	–	3	Ilm, Zrn, Ap
Note: Mineral abbreviations are after Whitney and Evans (2010).

## Sheet: TABLE S2
TABLE S2. BULK-ROCK COMPOSITION OF REPRESENTATIVE SAMPLES
Sample		XRF bulk-rock compositions (wt%)
		SiO2	TiO2	Al2O3	TFe2O3	MnO	MgO	CaO	Na2O	K2O	P2O5	LOI	Total
18AK98	Mafic granulite	47.03	1.49	13.64	17.03	0.21	7.47	10.8	2.01	0.44	0.11	0.1	100.33
18AK100	Mafic granulite	49.81	1.94	13.17	18.9	0.38	5.42	5.4	1.96	1.14	0.3	1.15	99.57
18AK104	Mafic granulite	48.08	1.24	13.92	14.63	0.24	6.95	11.75	2.12	0.56	0.08	0.4	99.97
18AK118	Grt-Cpx amphibolite	47.54	1.55	13.19	16.64	0.25	6.8	11.2	1.86	0.23	0.11	0.26	99.63
18AK101	Paragneissic granulite	47.86	1.65	17.57	12.66	0.2	7.33	5.92	2.43	2.86	0.34	0.27	99.09
AK34	Pelitic granulite	57.77	0.74	17.77	9.37	0.18	3.54	5.91	2.79	1.18	0.15	0.52	99.93
18AK86	Pelitic granulite	66.84	0.62	12.56	9.32	0.14	2.67	2.11	2.1	2.5	0.04	0.8	99.7
Sample		Effective bulk-rock compositions used in pseudosection modeling (wt%)
		SiO2	TiO2	Al2O3	FeO	MnO	MgO	CaO	Na2O	K2O	H2O	O2	Total
18AK98	Mafic granulite	46.9	1.49	13.6	16.98	–	7.45	10.77	2	–	0.35	0.45	100
18AK104	Mafic granulite	48.36	1.25	14	14.71	–	6.99	11.82	2.13	–	0.49	0.25	100
18AK101	Paragneissic granulite	48.11	1.66	17.66	12.72	0.2	7.37	5.95	2.44	2.87	0.9	0.11	100
AK34	Pelitic granulite	58.06	0.75	17.86	9.42	0.18	3.56	5.94	2.81	1.19	0.15	0.09	100
18AK86	Pelitic granulite	67.39	0.63	12.66	9.4	0.14	2.69	2.13	2.12	2.52	0.22	0.1	100

## Sheet: TABLE S3
TABLE S3. SUMMARY CHEMICAL COMPOSITION DATA OF REPRESENTATIVE MINERALS
Sample	AK34								18AK86							18AK98													18AK100											18AK101									18AK104
Metamorphic assemblage	Peak assemblage (M2)					Retrograde assemblage (M3)			Peak assemblage (M2)							Prograde assemblage (M1)				Peak assemblage (M2)						Retrograde assemblage (M3)			Prograde assemblage (M1)			Peak assemblage (M2)					Retrograde assemblage (M3)			Peak assemblage (M2)					Retrograde assemblage (M3)				Prograde assemblage (M1)
Mineral	Grt2	Opx2	Pl2	Kfs2	Bt	Opx3	Bt3		Grt2-1	Grt2-2	Opx2	Bt2	Pl2	Kfs2		Grt1	Cpx1	Pl1		Grt2	Cpx2	Opx2	Amp2	Pl2		Amp3	Pl3		Amp1	Pl1		Grt2	Opx2	Amp2	Pl2		Amp3	Pl3		Grt2	Opx2	Bt2	Pl2	Grt-rim	Bt3	Amp3	Pl3		Grt1
SiO2	37.366	50.3688	55.4904	64.489	34.7541	50.6334	35.2611		37.226	36.982	49.3674	34.7823	61.442	64.385		38.0885	51.8585	56.519		38.0277	51.2122	50.5174	41.8215	57.0314		43.9093	47.8267		43.4524	56.8048		37.6427	50.2011	43.634	57.3639		43.1507	56.2965		37.5255	50.9526	36.2773	55.2172	37.183	35.6165	44.5995	49.3834		37.4795
TiO2	0.06875	0.0802	0.016	0.0998889	5.6778	0.0488	5.21156		0.118	0	0.179071	2.40667	0.0566	0.111786		0.3	0.317	0.116		0.029	0.2468	0.0944469	1.9494	0.032125		1.27385	0.021		1.6229	0.0652857		0.0268571	0.0407794	0.971024	0		0.76299	0		0.0529	0.112067	5.1774	0.125615	0.068	4.8495	1.19193	0.0208		0.1745
Al2O3	21.6977	2.2382	27.7508	17.6242	14.8318	2.3994	14.9057		20.744	20.991	1.55929	14.9137	24.1492	18.2764		20.706	1.4755	27.2045		21.3707	2.096	0.866	10.9908	26.7784		10.934	32.4373		11.9477	26.981		20.5546	0.951033	10.5242	27.1575		11.55	27.7938		21.2242	0.965	13.3826	27.7771	21.217	13.347	9.51679	31.4954		20.877
FeOT	28.8377	31.294	0.0874	0.025	19.3239	29.1262	18.4246		33.08	33.573	34.1814	23.6672	0.072	0.123255		27.719	10.763	0.2785		27.2865	12.3842	31.792	17.7711	0.100375		17.0785	0.311667		13.6905	0.527729		28.605	33.1321	19.413	0.0496143		19.4192	0.191453		27.3245	29.7501	16.4646	0.0819231	28.08	17.965	15.1247	0.2794		28.3675
MnO	1.13375	0.4308	0.00803333	0.00344444	0.0671333	0.3276	0.0503333		1.081	1.025	0.127571	0.033	0.0048	0.00390238		0.8905	0.037	0.005		0.87225	0.0626	0.156094	0.0320238	0.007125		0.103831	0.009		0.04962	0.0271571		0.231143	0.526671	0.183724	0		0.165057	0		0.4316	0.279733	0.0257333	0.00330769	0.917	0.0335	0.06976	0.0118		0.844
MgO	5.47075	15.4916	0.00533333	0	9.67553	16.62	10.9412		4.511	4.586	13.4566	9.70667	0.0088	0.00509524		4.7595	12.6475	0.0095		4.876	11.2262	15.7706	9.57418	0.008625		10.2131	0		11.7422	0.0175		4.78686	14.6185	9.58099	0.00192857		9.20753	0.00481667		5.6918	16.7278	13.2195	0.00992308	4.134	12.724	11.89	0.0084		5.0235
CaO	4.86975	0.284	10.2258	0.058	0.0146	0.2524	0.035		2.892	2.369	0.247	0	5.3036	0.0236095		7.0415	22.243	10.2715		7.2375	21.6094	0.597425	11.5479	9.68063		11.5947	16.7843		11.5004	9.08103		7.134	0.424515	10.8373	9.01979		10.8029	9.72898		6.7722	0.659533	0	10.5791	6.716	0	11.5228	15.761		7.352
Na2O	0.0055	0.0106	5.67423	0.622	0.108467	0.004	0.115222		0	0	0.0214286	0.125	8.22	0.642555		0.001	0.2215	5.612		0.01225	0.388	0.0209313	1.45514	5.97762		1.39375	2.03067		1.60226	6.44909		0.00714286	0.0145347	1.39916	6.61559		1.41056	6.24874		0.0031	0.0128	0.1558	5.54162	0.001	0.1315	1.11275	2.7094		0.009
K2O	0.00725	0.0054	0.365267	16.1644	10.4779	0.0066	10.5749		0.022	0.002	0.00507143	9.00817	0.1592	16.2141		0.006	0	0.443		0.00125	0.0064	0.00583438	1.8899	0.240625		0.991662	0.0626667		1.2189	0.102586		0.00842857	0	0.632106	0.116105		0.613181	0.08114		0.0036	0.00473333	9.6508	0.133077	0.015	9.0155	1.23692	0.0704		0.0005
ZnO	0	0	0	0	0	0	0		0	0	0	0	0	0		0	0	0		0	0	0	0	0		0	0		0	0		0	0	0	0		0	0		0	0	0	0	0	0	0	0		0
Cr2O3	0.006	0.025	0.00996667	0	0.0424	0.0216	0.0671111		0.018	0.031	0	0.081	0	0		0.026	0	0		0.0365	0	0	0.0643571	0		0.0791077	0		0.00536	0.00931429		0.00742857	0.00477818	0.0051	0.00367381		0.0240952	0		0.0207	0	0.0343333	0	0.002	0.0265	0.1536	0.0094		0.0125
NiO	0	0.0262	0	0	0.0191333	0.0268	0.00655556		0	0	0.0187857	0	0	0		0	0.031	0		0	0.0222	0.0110469	0.00585714	0		0.00362308	0		0.02082	0		0	0.00245253	0.00369412	0		0.00358571	0.00571333		0	0.011	0.0192667	0	0	0.012	0	0		0
Total	99.4632	100.255	99.6333	99.086	94.9928	99.4668	95.5932		99.692	99.559	99.1636	94.7237	99.4162	99.7857		99.538	99.594	100.459		99.7498	99.254	99.8318	97.1022	99.8569		97.5796	99.4833		96.8555	100.067		99.0041	99.9259	97.1909	100.346		97.1134	100.37		99.0501	99.4753	94.4073	99.4688	98.333	93.721	96.4187	99.7494		100.14
Si	2.94612	1.95475	2.51011	3.01201	2.69636	1.96187	2.70379		2.97187	2.95654	1.9664	2.73671	2.73849	2.98852		3.00729	1.95675	2.53611		2.9863	1.95196	1.97072	6.39009	2.56501		6.56522	2.20794		6.47388	2.55367		2.98704	1.97277	6.54221	2.56463		6.47134	2.52403		2.9558	1.97924	2.77381	2.50124	2.97819	2.75777	6.68666	2.26655		2.93818
Ti	0.00407733	0.00234117	0.000544407	0.00350927	0.331346	0.00142227	0.30059		0.00708591	0	0.00536523	0.142434	0.00189754	0.0039029		0.0178169	0.00899714	0.00391526		0.00171301	0.00707574	0.00277141	0.224047	0.0010868		0.143266	0.000729231		0.181875	0.00220764		0.00160306	0.00120541	0.109511	0		0.0860707	0		0.00313425	0.00327444	0.297772	0.00428009	0.00409681	0.282445	0.134419	0.000718087		0.0102899
Al	2.01625	0.102373	1.47947	0.970145	1.35619	0.10957	1.34705		1.95179	1.9778	0.0732005	1.38296	1.26854	0.999813		1.92679	0.0656162	1.4387		1.97792	0.0941552	0.039816	1.97921	1.41943		1.92677	1.76489		2.09793	1.42953		1.92232	0.0440468	1.85971	1.43097		2.04149	1.46865		1.97032	0.0441788	1.20598	1.48294	2.00285	1.218	1.68161	1.70368		1.9289
Fe2+	1.81693	1.01428	0.0033063	0.000976487	1.25378	0.977132	1.18149		2.11714	2.13725	1.15203	1.5573	0.0026837	0.00478444		1.80983	0.321079	0.0104509		1.74964	0.37854	1.02342	2.15701	0.00377535		1.90813	0.0120327		1.62894	0.0198402		1.80448	1.0807	1.82774	0.00185502		1.81897	0.00717847		1.68857	0.973796	1.05281	0.00310344	1.84673	1.1633	1.61305	0.0107242		1.69862
Fe3+	0.0845511	0	0	0	0	0	0		0.0913989	0.107358	0	0	0	0		0.0221297	0.0190914	0		0.0457754	0.0167608	0.0150714	0.113793	0		0.227367	0		0.0768469	0		0.101881	0.00896595	0.60641	0		0.616569	0		0.111366	0	0	0	0.0341501	0	0.283324	0		0.174809
Mn	0.075714	0.0141609	0.00030779	0.000136262	0.00441159	0.0107513	0.00326902		0.0730962	0.0694069	0.00430399	0.00219922	0.000181206	0.000153421		0.0595526	0.0011825	0.000190033		0.0580175	0.00202095	0.00515769	0.00414444	0.000271422		0.0131493	0.00035192		0.0062617	0.00103407		0.0155355	0.0175302	0.0233319	0		0.0209665	0		0.0287949	0.00920366	0.00166657	0.000126909	0.0622102	0.00219703	0.00885873	0.000458724		0.0560418
Mg	0.643027	0.896261	0.000359651	0	1.11906	0.960002	1.25069		0.536865	0.546558	0.799057	1.13854	0.000584705	0.000352569		0.560211	0.711425	0.000635485		0.570828	0.637879	0.917153	2.18081	0.000578286		2.27646	0		2.60801	0.00117281		0.566264	0.856394	2.1415	0.000128537		2.05854	0.000321935		0.668354	0.968676	1.50683	0.000670094	0.493613	1.46872	2.65748	0.000574741		0.587083
Ca	0.41139	0.0118092	0.495617	0.0029025	0.00121366	0.0104784	0.00287553		0.247375	0.202923	0.0105415	0	0.253273	0.00117417		0.59569	0.899254	0.493833		0.608968	0.882496	0.0249713	1.89054	0.4665		1.85749	0.830221		1.83584	0.437409		0.60655	0.0178743	1.74098	0.432071		1.73588	0.467362		0.571546	0.0274499	0	0.513454	0.576357	0	1.85102	0.77507		0.617537
Na	0.000840781	0.000797594	0.497654	0.0563258	0.016316	0.000300496	0.0171301		0	0	0.0016549	0.0190689	0.710336	0.0578266		0.000153083	0.0162045	0.488244		0.00186516	0.0286731	0.00158316	0.431082	0.521255		0.404041	0.181761		0.462839	0.562114		0.00109895	0.00110743	0.406738	0.573456		0.410151	0.54319		0.000473431	0.000964023	0.023097	0.486702	0.000155294	0.0197415	0.323462	0.241104		0.00136796
K	0.00072924	0.000267351	0.0210787	0.963141	1.03707	0.000326238	1.03445		0.0022406	0.000203977	0.000257704	0.9042	0.00905205	0.960111		0.000604354	0	0.0253592		0.000125228	0.000311197	0.00029036	0.368388	0.0138062		0.189154	0.00369073		0.231674	0.00588336		0.000853243	0	0.120906	0.00662207		0.117315	0.00464095		0.000361751	0.000234561	0.941378	0.00769028	0.0015327	0.890544	0.236581	0.00412207		5.0005e-05
Zn	0	0	0	0	0	0	0		0	0	0	0	0	0		0	0	0		0	0	0	0	0		0	0		0	0		0	0	0	0		0	0		0	0	0	0	0	0	0	0		0
Cr	0.000374028	0.000767094	0.000356454	0	0	0.000661706	0		0.00113615	0.00195945	0	0	0	0		0.00162306	0	0		0.00226623	0	0	0	0		0	0		0	0.000331061		0.000466063	0.000148458	0.000148458	0.000129862		0	0		0.00128913	0	0	0	0.000126653	0	0	0.000341107		0.000774771
Ni	0	0.000817856	0	0	0	0.000835245	0		0	0	0.000601875	0	0	0		0	0.000940857	0		0	0.000680607	0.000346633	0.000346633	0		0	0		0	0		0	7.75217e-05	7.75217e-05	0		0	0.000206039		0	0.000343692	0	0	0	0	0	0		0
Total	8	3.99863	5.0088	5.00914	7.81576	3.99716	7.84135		8	8	3.9986	7.88341	4.98504	5.01664		8.00169	4.00054	4.99743		8.00342	4.00055	4.0013	15.7391	4.99172		15.511	5.00161		15.6041	5.01319		8.00809	4.00081	15.379	5.00986		15.3773	5.01556		8	3.99936	7.80334	5.00021	8	7.80271	15.4765	5.00334		8.01365
Note: For garnet, cations are calculated based on 12-oxygens. Ferric iron contents are determined according to the method of Droop (1987). Grt1 refers the core of the garnet contacting with inclusion minerals while Grt2 is the inner rim of the garnet. For orthopyroxene and clinopyroxene, cations are computed based on 6-oxygens. Ferric iron contents are confirmed according to the method of Droop (…
[truncated: 18 more columns]

## Sheet: TABLE S4
TABLE S4. SIMS U-PB GEOCHRONOLOGICAL DATA OF MONAZITE
Spot	Content				Isotopic ratios						Age (Ma)
	U (ppm)	Th (wt%)	Th/U		207Pb/235U	σ (%)	206Pb/238U	σ (%)	r		207Pb/206Pb	σ	207Pb/235U	σ	206Pb/238U	σ	%discordance
Monazite U-Pb isotopes for sample AK21
AK21-01	4039.36	6.53238	16.1718		5.89491	1.56278	0.349192	1.50878	0.965442		1992.04	7.22402	1960.48	13.6583	1930.74	25.2222	1.58382
AK21-02	6038.55	14.741	24.4115		5.09898	1.54975	0.325533	1.50512	0.971205		1857.82	6.65523	1835.94	13.2418	1816.69	23.8725	1.17814
AK21-03	5230.39	4.25244	8.13026		6.21812	1.54773	0.35316	1.50449	0.972061		2066.53	6.39051	2007	13.6292	1949.67	25.362	2.88062
AK21-04	6385.72	4.09356	6.41049		5.10287	1.55573	0.323989	1.50597	0.96801		1867.78	7.02667	1836.58	13.2949	1809.18	23.8002	1.67034
AK21-05	4520.06	5.07565	11.2292		5.80224	1.59404	0.347221	1.54407	0.968654		1973.91	7.03868	1946.75	13.9009	1921.31	25.705	1.37618
AK21-06	5239.79	3.36872	6.4291		6.29529	1.54922	0.360676	1.50718	0.972859		2051.14	6.31711	2017.8	13.6658	1985.38	25.8056	1.62534
AK21-07	2457.97	5.24053	21.3206		5.19657	1.58064	0.326655	1.51447	0.958136		1885.81	8.12587	1852.06	13.5495	1822.15	24.0836	1.78981
AK21-08	4989.88	2.70585	5.42267		5.7251	1.66362	0.341941	1.61847	0.972862		1977.36	6.84011	1935.16	14.4831	1896	26.6403	2.13403
AK21-09	4808.23	5.00469	10.4086		5.808	1.55873	0.347389	1.51387	0.971221		1974.82	6.59951	1947.6	13.5928	1922.12	25.2103	1.37789
AK21-10	3188.47	13.4224	42.0966		5.12479	1.55986	0.328337	1.50056	0.961985		1851.45	7.68189	1840.22	13.3398	1830.32	23.9547	0.606116
AK21-11	6485.13	9.76041	15.0505		5.10261	1.58868	0.324986	1.53225	0.964478		1862.15	7.55831	1836.54	13.5783	1814.03	24.2727	1.37504
AK21-12	4684.89	14.6544	31.28		5.03481	1.55522	0.324185	1.5065	0.968673		1842.43	6.97389	1825.2	13.2609	1810.13	23.8195	0.935222
AK21-13	4341.52	8.16329	18.8028		5.06823	1.58218	0.324352	1.52591	0.964437		1853.46	7.53962	1830.8	13.5072	1810.95	24.1365	1.22239
AK21-14	4918.85	2.95868	6.01498		5.8278	1.55036	0.345776	1.50346	0.969746		1989.16	6.71616	1950.55	13.5262	1914.39	24.9501	1.94081
AK21-15	4543.66	7.12012	15.6705		5.06451	1.68812	0.32251	1.64384	0.973771		1862.42	6.91891	1830.18	14.4163	1801.98	25.8937	1.73098
AK21-16	4404.77	5.40594	12.2729		5.13536	1.55674	0.325205	1.50808	0.96874		1872.47	6.94814	1841.97	13.3175	1815.1	23.9013	1.6288
AK21-17	6156.07	4.00313	6.50274		5.67677	1.5876	0.342055	1.52643	0.961468		1961.66	7.76748	1927.84	13.7992	1896.55	25.1285	1.72373
AK21-18	6143.07	2.23668	3.64098		5.67564	1.56912	0.340789	1.50619	0.959894		1967.92	7.82326	1927.67	13.6371	1890.46	24.7261	2.04513
AK21-19	5410.09	5.4272	10.0316		5.07822	1.56868	0.322614	1.50358	0.958497		1866.72	8.04893	1832.47	13.3956	1802.48	23.686	1.83468
AK21-20	3220.66	8.72984	27.1058		5.07689	1.55005	0.322397	1.50252	0.969334		1867.46	6.85764	1832.25	13.2349	1801.42	23.6572	1.88543
AK21-21	2287	7.04434	30.8017		5.06746	1.6248	0.321531	1.56161	0.961111		1868.96	8.07314	1830.67	13.8732	1797.2	24.5394	2.0483
AK21-22	4073.72	5.12657	12.5845		5.11363	1.56199	0.324939	1.50835	0.965661		1866.3	7.30562	1838.37	13.3533	1813.81	23.8908	1.49634
AK21-23	6081.17	2.73477	4.49711		6.22145	1.54994	0.359745	1.50928	0.973762		2034.85	6.22736	2007.47	13.6499	1980.96	25.7924	1.34566
AK21-24	4327.69	3.19899	7.3919		5.43275	1.55355	0.33234	1.50821	0.970813		1934.63	6.65468	1890.04	13.4104	1849.71	24.2977	2.30486
AK21-25	1722.35	7.49757	43.5311		4.96612	1.56555	0.318017	1.5159	0.968281		1852.32	7.05467	1813.57	13.3189	1780.04	23.6218	2.09193
AK21-26	4424	2.79215	6.31136		5.72202	1.57051	0.340899	1.50821	0.96033		1981.84	7.77581	1934.7	13.666	1890.99	24.7653	2.37863
AK21-27	4922.06	3.42314	6.95469		5.66273	1.56984	0.341755	1.50736	0.960201		1958.8	7.80586	1925.7	13.6387	1895.11	24.7978	1.68978
AK21-28	4816.19	3.81632	7.92394		5.72532	1.56534	0.342864	1.52111	0.971747		1972.63	6.56931	1935.2	13.6218	1900.44	25.085	1.89738
AK21-29	6436.47	1.98348	3.08162		5.80832	1.54633	0.349137	1.50299	0.97197		1965.97	6.46946	1947.65	13.4842	1930.48	25.1223	0.931483
Monazite U-Pb isotopes for sample AK34
AK34-01	5743.11	10.8505	18.8931		5.04572	1.56005	0.325577	1.50412	0.964148		1838.59	7.47738	1827.03	13.3072	1816.91	23.8591	0.628685
AK34-02	7835.58	4.83955	6.17638		4.97619	1.57597	0.319226	1.51192	0.959358		1849.13	8.02089	1815.29	13.4127	1785.95	23.6277	1.83028
AK34-03	6348.25	5.1058	8.04286		5.7517	1.57397	0.341934	1.53375	0.974446		1985.65	6.27752	1939.17	13.7069	1895.97	25.2426	2.34065
AK34-04	7113.26	7.27341	10.2251		4.93428	2.01676	0.317249	1.97859	0.981073		1845.06	7.04917	1808.14	17.1714	1776.28	30.7924	2.00117
AK34-05	5749.56	8.80071	15.3068		5.01502	1.55886	0.321244	1.51547	0.972165		1851.79	6.58825	1821.86	13.2834	1795.8	23.7967	1.61604
AK34-06	5566.02	9.00809	16.1841		5.0056	1.55719	0.320692	1.50406	0.965881		1851.5	7.27337	1820.27	13.2649	1793.11	23.5865	1.68671
AK34-07	8256.62	4.65609	5.63922		5.63544	1.56953	0.343695	1.52614	0.97235		1940.05	6.54229	1921.54	13.626	1904.42	25.2135	0.954449
AK34-08	5908.41	11.636	19.6939		5.06394	1.54151	0.322957	1.50073	0.973544		1859.72	6.34822	1830.09	13.1559	1804.16	23.6601	1.59324
AK34-09	8578.68	7.31637	8.52855		5.00597	1.61806	0.320925	1.56079	0.964609		1850.31	7.69475	1820.33	13.7871	1794.25	24.4914	1.62041
AK34-10	5903.07	9.67378	16.3877		4.97648	1.54955	0.319038	1.50589	0.971827		1850.29	6.58919	1815.33	13.1865	1785.03	23.5229	1.88941
AK34-11	6980.19	6.78837	9.72519		5.76282	1.56325	0.344735	1.50511	0.962811		1974.56	7.50568	1940.84	13.6167	1909.41	24.9215	1.70778
AK34-12	4494.73	2.14193	4.76542		9.93283	1.63423	0.442683	1.57275	0.962381		2484.27	7.46663	2428.56	15.1889	2362.64	31.1853	2.2424
AK34-13	5437.55	8.46076	15.5599		5.00968	1.69793	0.320275	1.6543	0.974305		1855.32	6.89477	1820.96	14.4743	1791.07	25.9217	1.85215
AK34-14	6647.25	16.4299	24.7168		5.05804	1.57012	0.32209	1.50441	0.958148		1862.47	8.09342	1829.1	13.3991	1799.93	23.6699	1.79179
AK34-15	10022.7	15.4766	15.4416		5.05961	1.55381	0.323738	1.50305	0.96733		1853.81	7.10279	1829.36	13.2597	1807.96	23.7401	1.31872
AK34-16	7916.89	2.65686	3.35594		4.83954	1.54539	0.31284	1.50493	0.973822		1835.3	6.34993	1791.8	13.0885	1754.67	23.1593	2.37038
AK34-17	9340.69	9.36853	10.0298		5.65572	1.54803	0.343352	1.50294	0.97087		1948.26	6.61411	1924.63	13.4454	1902.77	24.811	1.21284
AK34-18	6096.7	8.75555	14.3611		4.96565	1.54882	0.320304	1.5049	0.971643		1839.19	6.61619	1813.49	13.1754	1791.21	23.578	1.39721
AK34-19	6484.59	9.3966	14.4907		4.96437	1.59922	0.318945	1.543	0.964844		1846.42	7.58419	1813.27	13.6064	1784.57	24.0982	1.79498
AK34-20	8929.2	13.4311	15.0417		5.04973	1.54496	0.320514	1.50588	0.974705		1868.36	6.21687	1827.7	13.1794	1792.24	23.6052	2.17579
AK34-21	6968.33	9.3515	13.42		5.01944	1.57226	0.320835	1.53118	0.973875		1855.68	6.4377	1822.61	13.4003	1793.81	24.0208	1.78226
AK34-22	6017.57	12.88	21.404		5.01749	1.56685	0.319328	1.50951	0.963406		1863.48	7.56279	1822.28	13.3531	1786.45	23.5958	2.21119
AK34-23	6814.45	14.0378	20.6001		4.9354	1.55818	0.317656	1.5001	0.962728		1843.15	7.60754	1808.33	13.2418	1778.27	23.355	1.8893
AK34-24	6679.75	13.5887	20.3432		4.92835	1.61175	0.315511	1.56203	0.969156		1852.82	7.16279	1807.12	13.6968	1767.77	24.196	2.4664
AK34-25	5643.02	8.45857	14.9894		4.89849	1.5562	0.316253	1.50003	0.9639		1837.58	7.48511	1802	13.2081	1771.41	23.2754	1.93621
AK34-26	6407.98	7.27716	11.3564		5.62374	1.54814	0.338529	1.50433	0.971707		1963.39	6.50885	1919.74	13.4348	1879.59	24.573	2.22318
AK34-27	9923.04	15.1383	15.2557		5.05399	1.5528	0.323056	1.50301	0.967937		1855.61	7.03171	1828.42	13.2486	1804.64	23.7017	1.46525
AK34-28	7912.13	9.84905	12.448		4.9222	1.59739	0.317916	1.54235	0.965541		1836.83	7.51035	1806.07	13.5712	1779.54	24.0289	1.67442
AK34-29	7876.31	6.71453	8.52497		4.95537	1.5644	0.319598	1.5043	0.961584		1839.43	7.75517	1811.74	13.3042	1787.77	23.5293	1.50536

## Sheet: TABLE S5
TABLE S5. SHRIMP U-PB GEOCHRONOLOGICAL DATA OF ZIRCON
Spot	Content (ppm)				Th/U		Isotopic ratios							Age (Ma)
	U	Th	206Pb*				207Pb/206Pb	σ (%)	207Pb/235U	σ (%)	206Pb/238U	σ (%)		207Pb/206Pb	σ	207Pb/235U	σ	206Pb/238U	σ	%discordance
Zircon U-Pb isotopes for sample AK34
AK34-01	2106.13	221.453	624		0.108645		0.11387	0.28	5.412	1.5	0.3447	1.4		1860.2	5	1885.62	12.4723	1909	24	1.34811
AK34-02	2679.6	32.0558	1120		0.0123609		0.15961	0.18	10.69	1.4	0.4858	1.4		2450.5	3	2495.99	13.3285	2552	30	1.82268
AK34-03	4706.45	243.556	1160		0.053471		0.11048	0.23	4.38	1.4	0.2875	1.4		1803.7	4.2	1706.73	11.8835	1629	21	5.37633
AK34-04	1444.03	77.7012	436		0.0555985		0.1131	0.45	5.485	1.5	0.3517	1.4		1846.7	8.2	1896.59	12.9352	1942	24	2.63041
AK34-05	2022.77	52.0835	612		0.0266052		0.11551	0.28	5.609	1.5	0.3522	1.4		1887.5	5.1	1917.25	12.6224	1945	24	1.55152
AK34-06	1578.39	72.6403	464		0.0475526		0.11314	0.33	5.344	1.5	0.3426	1.4		1848.7	5.9	1874.98	12.599	1899	24	1.40177
AK34-07	1892.74	14.4908	601		0.00791068		0.1199	0.27	6.111	1.5	0.3697	1.4		1954.3	4.9	1991.63	12.7112	2028	25	1.87433
AK34-08	1175.3	25.5647	476		0.0224753		0.16295	0.32	10.59	1.5	0.4712	1.5		2484.6	5.4	2486.38	13.8057	2489	30	0.0716174
AK34-09	1363.12	58.0676	417		0.0440163		0.1139	0.33	5.592	1.5	0.356	1.4		1860.3	6	1913.55	12.7103	1963	25	2.78257
AK34-10	2086.56	219.703	612		0.108797		0.11401	0.27	5.373	1.5	0.3418	1.4		1857.6	5	1876.89	12.4513	1894	24	1.0278
AK34-11	879.481	29.0321	272		0.0341087		0.12858	0.4	6.382	1.5	0.36	1.5		2064.6	7.3	2021.63	13.2414	1980	25	2.08147
AK34-12	2167.38	37.7989	652		0.0180201		0.1177	0.26	5.681	1.5	0.35	1.4		1915	4.8	1924.79	12.5342	1934	24	0.508628
AK34-13	1539.22	33.8226	627		0.0227049		0.15297	0.34	10	1.5	0.4743	1.4		2380.1	5.8	2435.69	13.6012	2503	30	2.28247
AK34-14	3796.84	38.0122	1110		0.0103446		0.11824	0.2	5.568	1.4	0.3415	1.4		1928.1	3.6	1910.22	12.353	1894	23	0.92746
AK34-15	1591.58	16.303	637		0.010584		0.16043	0.32	10.3	1.5	0.4657	1.5		2459	5.4	2461.56	13.6644	2465	30	0.103826
AK34-16	951.327	26.6265	291		0.0289199		0.12144	0.4	5.963	1.5	0.3561	1.5		1974.4	7.4	1968.74	13.1345	1963	25	0.286845
AK34-17	2156.74	217.144	624		0.104031		0.11333	0.28	5.262	1.5	0.3367	1.4		1849.1	5.1	1860.24	12.4345	1870	23	0.598938
AK34-18	2295.76	31.4538	904		0.0141566		0.15783	0.21	9.98	1.5	0.4585	1.4		2431	3.5	2431.68	13.3142	2433	29	0.0280415
AK34-19	5350.74	223.709	531		0.0431998		0.09245	0.33	1.465	1.5	0.1149	1.4		1470.1	9.4	914.09	9.07104	701.4	9.5	37.8212
AK34-20	2629.82	32.7136	1070		0.0128533		0.1603	0.23	10.47	1.5	0.4736	1.4		2458.5	3.8	2476.94	13.3734	2499	30	0.744548
AK34-21	2443.44	26.2119	1070		0.0110843		0.16184	0.36	11.34	1.5	0.5082	1.5		2475	6.1	2551.57	13.8725	2649	32	3.00079

## Sheet: TABLE S6
TABLE S6. LA-ICP-MS U-PB GEOCHRONOLOGICAL DATA OF ZIRCON
Spot	Content (ppm)				Isotopic ratios							Age (Ma)
	Th	U	Th/U		207Pb/206Pb	2σ	207Pb/235U	2σ	206Pb/238U	2σ		207Pb/206Pb	2σ	207Pb/235U	2σ	206Pb/238U	2σ	%discordance
Zircon U-Pb isotopes for sample 18AK98
18AK98-01	21.33	199.4	0.106971		0.12084	0.00094	5.987	0.054	0.3589	0.0036		1966	14	1973.3	7.8	1976	17	0.369939
18AK98-02	70.6	283.2	0.249294		0.1195	0.0011	5.889	0.057	0.3567	0.0037		1947	17	1958.9	8.4	1966	18	0.607484
18AK98-03	41.6	347	0.119885		0.12243	0.00085	6.396	0.05	0.3779	0.0031		1992	12	2031	6.9	2066	15	1.92024
18AK98-04	50.3	457	0.110066		0.12016	0.00071	6.024	0.058	0.3606	0.0036		1958	11	1978.7	7.8	1985	17	1.04614
18AK98-05	87.5	506	0.172925		0.12102	0.00067	5.775	0.046	0.3452	0.0033		1970.2	9.8	1941.9	6.8	1911	16	1.4364
18AK98-06	62.7	436	0.143807		0.121	0.00093	5.958	0.055	0.3559	0.0038		1969	14	1968.9	8.2	1962	18	0.00507872
18AK98-07	44.3	405	0.109383		0.11921	0.00089	5.518	0.057	0.3346	0.0037		1943	13	1902.5	8.9	1860	18	2.08441
18AK98-08	44.6	222.3	0.20063		0.1187	0.0011	5.324	0.055	0.3242	0.0033		1934	16	1871.6	8.7	1809	16	3.22647
18AK98-09	74.5	323	0.23065		0.12013	0.00095	6.01	0.05	0.3614	0.0034		1957	14	1976.7	7.3	1988	16	0.996611
18AK98-10	69.2	504	0.137302		0.12076	0.00068	6.103	0.049	0.3634	0.0031		1967	10	1990	6.9	1998	15	1.15578
18AK98-11	45.7	211.2	0.216383		0.11927	0.00093	5.616	0.048	0.3404	0.0027		1943	14	1917.6	7.4	1888	13	1.30726
18AK98-12	55.1	491	0.11222		0.12193	0.00071	6.192	0.06	0.3667	0.0034		1984	10	2002.7	8.2	2013	16	0.933739
18AK98-13	48.2	236.8	0.203547		0.1198	0.00092	5.892	0.05	0.355	0.0029		1951	14	1959.2	7.4	1958	14	0.418538
18AK98-14	100.9	417	0.241966		0.11876	0.00073	5.955	0.055	0.3612	0.0037		1937	11	1969.8	7.7	1987	17	1.66514
18AK98-15	42	226.5	0.18543		0.12145	0.00085	6.098	0.051	0.3622	0.0035		1976	13	1989.2	7.3	1992	17	0.663583
18AK98-16	42.9	128.5	0.333852		0.1222	0.0011	6.209	0.061	0.3664	0.0028		1985	17	2004.6	8.6	2012	13	0.977751
18AK98-17	26.29	140.1	0.187652		0.1206	0.001	5.984	0.057	0.3578	0.0031		1964	15	1972.4	8.3	1971	15	0.425877
18AK98-18	97.6	659	0.148103		0.12059	0.00084	5.976	0.071	0.3574	0.005		1963	12	1972	11	1969	24	0.456389
18AK98-19	18.76	180.9	0.103704		0.12075	0.00093	6.107	0.051	0.3638	0.0029		1970	14	1990.4	7.4	2000	14	1.02492
18AK98-20	158.1	564	0.280319		0.11969	0.00065	5.961	0.041	0.3587	0.0032		1950.6	9.5	1969.5	6	1975	15	0.959634
18AK98-21	51.9	266.3	0.194893		0.11982	0.00093	5.917	0.045	0.3561	0.0031		1951	14	1963.9	6.5	1965	15	0.656856
18AK98-22	50.9	226.1	0.225122		0.11942	0.00083	5.972	0.048	0.361	0.003		1946	13	1970.9	7	1987	14	1.26338
18AK98-23	18.17	208.5	0.0871463		0.1217	0.0011	6.027	0.066	0.3572	0.0034		1978	16	1978.4	9.3	1968	16	0.0202184
18AK98-24	78.8	369.5	0.213261		0.11963	0.00078	5.929	0.054	0.357	0.0038		1949	12	1964.9	7.7	1967	18	0.809201
18AK98-25	70	289	0.242215		0.12067	0.00088	6.029	0.044	0.3605	0.0033		1964	13	1979.4	6.3	1984	16	0.778014
18AK98-26	104.1	592	0.175845		0.1206	0.00084	6.03	0.06	0.3609	0.0039		1964	12	1979.4	8.8	1986	18	0.778014
18AK98-27	35.4	230.3	0.153713		0.11984	0.00093	5.885	0.049	0.3545	0.0032		1952	14	1958.2	7.3	1955	15	0.316617
18AK98-28	76.8	312	0.246154		0.12192	0.00075	6.206	0.05	0.3669	0.0031		1983	11	2004.6	7	2014	14	1.07752
18AK98-29	54.4	448	0.121429		0.1226	0.00081	6.236	0.04	0.3667	0.0032		1993	12	2008.9	5.7	2013	15	0.791478
18AK98-30	19.53	184.7	0.105739		0.123	0.001	6.32	0.049	0.3709	0.0033		1999	15	2020.5	6.8	2033	15	1.06409
18AK98-31	70.7	334.8	0.211171		0.11984	0.00085	5.584	0.05	0.3364	0.003		1952	12	1912.7	7.8	1869	15	2.01332
Zircon U-Pb isotopes for sample 18AK100
18AK100-01	187.1	440	0.425227		0.12071	0.00074	5.59	0.053	0.3344	0.0033		1965	11	1913.5	8.2	1859	16	2.62087
18AK100-02	93.4	206.4	0.452519		0.11794	0.00094	5.214	0.077	0.3186	0.0045		1923	14	1852	13	1782	22	3.69215
18AK100-03	51.8	112.2	0.461676		0.1326	0.0012	6.737	0.068	0.368	0.004		2132	15	2076.2	9	2019	19	2.61726
18AK100-04	81.8	156.9	0.521351		0.1204	0.001	5.861	0.053	0.3523	0.0032		1960	15	1956	8	1945	15	0.204082
18AK100-05	88.6	482.5	0.183627		0.1458	0.0014	8.2	0.11	0.4062	0.0034		2299	18	2253	13	2197	16	2.00087
18AK100-06	150.7	354.7	0.424866		0.1208	0.0015	5.868	0.097	0.3513	0.0031		1966	20	1956	13	1941	15	0.508647
18AK100-07	48.71	109.7	0.444029		0.1256	0.0011	5.71	0.08	0.3283	0.0035		2036	15	1931	12	1830	17	5.15717
18AK100-08	41.43	90.6	0.457285		0.1215	0.0013	6.093	0.061	0.363	0.0036		1974	19	1989.3	8.9	1998	17	0.769115
18AK100-09	103.9	354	0.293503		0.1646	0.001	10.78	0.13	0.4742	0.0053		2502	11	2501	11	2500	22	0.039968
18AK100-10	56.2	105.2	0.534221		0.1216	0.0011	6.037	0.063	0.3612	0.0034		1977	17	1982.2	9.4	1987	16	0.262335
18AK100-11	93.6	230	0.406957		0.12147	0.0009	6.232	0.054	0.371	0.0031		1976	14	2007.9	7.6	2034	15	1.58872
18AK100-12	49.78	134.5	0.370112		0.1203	0.0011	5.459	0.095	0.3284	0.0049		1958	17	1891	15	1829	24	3.42186
18AK100-13	41.4	95.3	0.434418		0.1381	0.0016	7.14	0.1	0.3744	0.0035		2200	21	2127	13	2049	17	3.31818
18AK100-14	39.43	89	0.443034		0.1215	0.0013	6.127	0.073	0.3652	0.004		1975	18	1993	10	2006	19	0.903161
18AK100-15	59.1	709	0.0833568		0.1362	0.0013	6.52	0.11	0.3466	0.0041		2178	16	2048	14	1918	19	5.96878
18AK100-16	49.4	372	0.132796		0.12087	0.00079	5.979	0.041	0.3579	0.0027		1968	12	1972.2	6	1972	13	0.21296
18AK100-17	85.7	216	0.396759		0.1299	0.0018	6.235	0.088	0.3487	0.004		2093	23	2012	12	1927	19	3.87004
18AK100-18	23.64	68.3	0.34612		0.1211	0.0014	5.935	0.08	0.3553	0.0035		1967	21	1964	12	1961	16	0.152517
18AK100-19	40.3	413.3	0.0975079		0.12571	0.00092	6.244	0.046	0.3595	0.0031		2037	13	2010.9	6.7	1979	15	1.2813
18AK100-20	27.46	262.4	0.104649		0.1456	0.0011	7.476	0.059	0.3717	0.003		2294	13	2169.5	7.1	2037	14	5.4272
18AK100-21	122.9	221	0.556109		0.12158	0.00092	5.629	0.055	0.3352	0.003		1978	13	1920.7	8.4	1863	14	2.89687
18AK100-22	196	413	0.474576		0.12875	0.00089	6.271	0.089	0.3525	0.005		2079	12	2012	13	1945	24	3.2227
18AK100-23	59.1	113.9	0.518876		0.1213	0.0012	6.025	0.062	0.3601	0.003		1971	17	1978.1	9	1982	14	0.35893
18AK100-24	21.7	61.6	0.352273		0.1214	0.0015	6.041	0.079	0.3606	0.0039		1971	23	1980	12	1984	19	0.454545
18AK100-25	53.4	430.6	0.124013		0.12118	0.00072	5.979	0.047	0.3571	0.0032		1972	11	1972.1	6.8	1968	15	0.00507074
18AK100-26	58.3	2395	0.0243424		0.12615	0.00066	5.07	0.079	0.2904	0.0043		2044.1	9.2	1828	13	1642	22	10.5719
18AK100-27	152.2	434	0.350691		0.12026	0.00067	5.893	0.057	0.3546	0.0035		1959	10	1959.1	8.5	1956	16	0.00510438
18AK100-28	125	457	0.273523		0.12412	0.00082	6.379	0.06	0.3717	0.0035		2015	12	2028.7	8.6	2037	16	0.675309
18AK100-29	112.6	204.2	0.55142		0.12143	0.00094	6.159	0.052	0.367	0.0031		1975	14	1997.8	7.4	2015	15	1.14126
18AK100-30	33.24	81.6	0.407353		0.1212	0.0013	6.098	0.089	0.3639	0.0036		1974	20	1988	13	2000	17	0.704225
18AK100-31	50.74	107.6	0.471561		0.1215	0.0012	6.018	0.063	0.3579	0.0032		1975	18	1977.2	9.1	1974	15	0.111268
18AK100-32	92.4	178.3	0.518228		0.1279	0.0011	6.798	0.078	0.3849	0.004		2067	15	2083.4	9.9	2098	19	0.787175
18AK100-33	205.4	632	0.325		0.12114	0.0007	6.023	0.037	0.3583	0.0029		1972	10	1978.6	5.4	1976	14	0.333569
18AK100-34	57.4	599	0.0958264		0.12404	0.00068	5.929	0.043	0.3455	0.0025		2014.1	9.7	1965.7	6.1	1914	12	2.40306
18AK100-35	112.3	272.7	0.411808		0.11916	0.00077	5.836	0.054	0.3537	0.003		1944	12	1950.7	8	1952	14	0.343466
18AK100-36	85.9	253	0.339526		0.12125	0.00086	6.008	0.052	0.3578	0.0035		1975	12	1976.1	7.5	1975	17	0.0556652
18AK100-37	54.1	370	0.146216		0.12132	0.00073	6.154	0.046	0.3666	0.0029		1974	11	1997.3	6.6	2013	14	1.16657
18AK100-38	49.9	346	0.14422		0.12141	0.00081	6.321	0.061	0.376	0.0038		1976	12	2020.3	8.5	2057	18	2.19274
18AK100-39	148.9	448	0.332366		0.1204	0.00095	5.493	0.049	0.3297	0.0041		1960	14	1898.9	7.8	1836	20	3.11735
18AK100-40	23.83	65.3	0.364931		0.1211	0.0017	5.899	0.083	0.3522	0.0037		1965	25	1959	12	1944	17	0.305344
18AK100-41	83.7	413	0.202663		0.1347	0.0014	7.04	0.1	0.3767	0.0033		2156	18	2114	13	2064	16	1.94805
18AK100-42	30.7	83.4	0.368106		0.1217	0.0015	6.073	0.074	0.3608	0.0038		1976	22	1985	11	1985	18	0.453401
Zircon U-Pb isotopes for sample 18AK101
18AK101-01	107	298	0.35906		0.1542	0.0012	9.36	0.12	0.4383	0.0049		2390	13	2372	11	2342	22	0.753138
18AK101-02	650	799	0.813517		0.15074	0.00087	7.58	0.071	0.3637	0.0037		2353.2	9.9	2181.3	8.4	1999	18	7.30495
18AK101-03	63.6	140.3	0.453314		0.1711	0.0024	9.15	0.16	0.386	0.004		2565	23	2351	16	2104	18	8.34308
18AK101-04	130.5	286.2	0.455975		0.1375	0.0012	7.71	0.11	0.4046	0.006		2195	15	2196	12	2189	27	0.0455373
18AK101-05	536	805	0.665839		0.1437	0.0011	5.698	0.069	0.2865	0.0037		2274	13	1930	10	1624	19	15.1275
18AK101-06	70.8	225	0.314667		0.1498	0.0011	8.16	0.082	0.3934	0.0044		2342	12	2247.5	9.1	2138	20	4.03501
18AK101-07	821	1038	0.790944		0.14726	0.00089	6.049	0.063	0.2977	0.0035		2313	10	1981.9	8.9	1683	19	14.3147
18AK101-08	394	681	0.578561		0.14842	0.00084	8.997	0.09	0.4371	0.005		2327.2	9.6	2336.9	9.1	2337	23	0.41508
18AK101-09	216.9	329.9	0.657472		0.15226	0.00097	8.57	0.18	0.4055	0.0079		2370	11	2288	19	2191	36	3.45992
18AK101-10	25.9	65.6	0.394817		0.1406	0.0026	6.72	0.23	0.3442	0.0093		2226	32	2064	31	1904	44	7.27763
18AK101-11	34.7	137.1	0.2531		0.1393	0.0013	7.14	0.13	0.3687	0.0051		2215	17	2125	16	2022	24	4.06321
18AK101-12	718	788	0.911168		0.15172	0.00097	7.684	0.091	0.3659	0.004		2364	11	2193	11	2009	19	7.2335
18AK101-13	46	242.3	0.189847		0.1591	0.002	8.2	0.13	0.3711	0.0062		2444	21	2252	14	2041	32	7.85597
18AK101-14	42.3	161.9	0.261272		0.1887	0.0037	10.81	0.21	0.415	0.0043		2728	33	2504	18	2237	20	8.21114
18AK101-15	61.1	198	0.308586		0.1496	0.0015	8.79	0.12	0.4235	0.0042		2338	18	2314	13	2275	19	1.02652
18AK101-16	298	638	0.467085		0.1445	0.0016	7.127	0.087	0.3575	0.0032		2278	20	2127	10	1970	15	6.62862
18AK101-17	107	269	0.39777		0.12904	0.00093	6.33	0.11	0.354	0.0063		2083	13	2019	15	1951	30	3.07249
18AK101-18	117.7	323	0.364396		0.147	0.0011	8.81	0.1	0.4325	0.0057		2310	12	2317	11	2316	26	0.302115
18AK101-19	54.6	185.4	0.294498		0.1637	0.0022	10.58	0.12	0.467	0.0068		2493	23	2486	11	2470	30	0.280786
18AK101-20	163	371	0.439353		0.1761	0.0015	10.97	0.25	0.45	0.01		2615	14	2517	22	2390	45	3.74761
18AK101-21	191	416	0.459135		0.154	0.0013	7.688	0.084	0.3601	0.0034		2390	14	2197.8	9.8	1982	16	8.04184
18AK101-22	124.2	282.4	0.439802		0.2068	0.0028	12.52	0.24	0.4363	0.0056		2878	22	2641	18	2333	25	8.23489
18AK101-23	72.3	251	0.288048		0.1427	0.0013	7.1	0.11	0.3588	0.0041		2259	16	2122	13	1976	19	6.06463
18AK101-24	81.3	109.1	0.745188		0.1212	0.0018	5.99	0.11	0.356	0.0054		1970	26	1972	17	1962	26	0.10142
18AK101-25	47.6	208.5	0.228297		0.1335	0.0011	6.559	0.063	0.3537	0.0041		2142	14	2052.7	8.4	1951	19	4.169
18AK101-26	146	310	0.470968		0.1821	0.0042	9.52	0.21	0.3797	0.0053		2659	38	2388	21	2074	25	10.1918
18AK101-27	55.2	81.2	0.679803		0.1244	0.0015	5.786	0.072	0.3358	0.0033		2015	21	1942	11	1866	16	3.62283
18AK101-28	477.9	1157	0.413051		0.1508	0.001	7.202	0.091	0.3464	0.0051		2354	12	2135	11	1916	24	9.30331
18AK101-29	79.8	213.2	0.374296		0.1488	0.0015	8.99	0.1	0.4365	0.0052		2330	18	2337	10	2334	23	0.299529
18AK101-30	306.2	748	0.409358		0.14078	0.00098	7.024	0.096	0.36	0.0046		2235	12	2112	12	1981	22	5.50336
18AK101-31	261.8	718	0.364624		0.13953	0.00076	6.644	0.051	0.3436	0.0029		2220.3	9.5	2065.3	6.9	1904	14	6.98104
18AK101-32	288	591	0.48731		0.1574	0.0012	9.99	0.13	0.4583	0.0067		2427	12	2433	12	2431	29	0.246609
18AK101-33	120	281	0.427046		0.1734	0.0017	11.14	0.28	0.463	0.011		2588	16	2527	25	2449	47	2.35703
18AK101-34	145.3	344	0.422384		0.1664	0.0015	8.96	0.13	0.3898	0.0073		2520	15	2332	14	2120	34	7.46032
18AK101-35	294	751	0.391478		0.15217	0.00074	8.172	0.072	0.3885	0.0036		2369.6	8.3	2251.3	7.6	2115	17	4.9924
18AK101-36	52.3	171	0.305848		0.1575	0.0013	9.97	0.1	0.4584	0.0043		2429	14	2432.2	9.1	2432	19	0.131568
18AK101-37	40.9	281	0.145552		0.12137	0.00083	5.677	0.056	0.3385	0.0034		1975	12	1926.7	8.5	1879	16	2.44557
18AK101-38	605	1083	0.558633		0.214	0.0034	9.97	0.21	0.3365	0.0057		2934	25	2430	20	1869	28	17.1779
18AK101-39	258.4	430	0.60093		0.1657	0.0011	11.039	0.068	0.4797	0.0035		2514	12	2526.2	5.7	2526	15	0.482939
18AK101-40	297	462	0.642857		0.1781	0.0017	7.24	0.14	0.2929	0.0045		2636	17	2138	17	1655	23	18.8923
18AK101-41	111.8	336.5	0.332244		0.1538	0.0012	9.46	0.12	0.4441	0.0059		2387	14	2382	11	2368	26	0.209468
18AK101-42	958	1504	0.636968		0.14811	0.00079	6.93	0.14	0.3374	0.0069		2323.6	9.1	2099	18	1872	33	9.66604
18AK101-43	623	723	0.861687		0.1749	0.0018	10.48	0.21	0.4316	0.0069		2604	17	2472	19	2310	31	5.06912
18AK101-44	108	399	0.270677		0.1597	0.0013	8.438	0.093	0.382	0.0051		2452	14	2278	10	2085	24	7.09625
18AK101-45	47.2	66	0.715152		0.1214	0.002	6.191	0.096	0.3675	0.0053		1972	30	2002	14	2017	25	1.4985
18AK101-46	539	606	0.889439		0.3258	0.0041	13.87	0.35	0.307	0.0056		3595	19	2735	25	1725	28	23.9221
18AK101-47	225	344	0.65407		0.2033	0.0017	10.61	0.22	0.3775	0.0069		2851	13	2488	20	2062	32	12.7324
18AK101-48	40.01	152.4	0.262533		0.1687	0.0017	10.98	0.13	0.4707	0.0057		2543	17	2521	11	2486	25	0.86512
18AK101-49	365	649	0.562404		0.15231	0.00078	9.253	0.071	0.4388	0.0037		2371.1	8.7	2362.5	7	2345	16	0.362701
18AK101-50	76.6	151.8	0.504611		0.2514	0.0036	15.54	0.32	0.4461	0.0082		3192	23	2847	20	2377	37	10.8083
18AK101-51	71.4	375	0.1904		0.12699	0.00088	6.459	0.057	0.3677	0.0029		2056	12	2040.8	8	2018	14	0.7393
18AK101-52	213	468	0.455128		0.166	0.0011	10.25	0.15	0.4462	0.0059		2520	12	2456	13	2377	26	2.53968
18AK101-53	432	800	0.54		0.16269	0.00084	9.22	0.15	0.41	0.0062		2482.9	8.7	2358	15	2213	28	5.03041
18AK101-54	160	894	0.178971		0.13766	0.00088	6.596	0.069	0.3465	0.0042		2197	11	2058	9.2	1917	20	6.32681
18AK101-55	57.7	248	0.232661		0.1534	0.0011	9.044	0.097	0.426	0.0042		2383	13	2340.9	9.8	2287	19	1.76668
18AK101-56	340	1076	0.315985		0.15437	0.00094	7.499	0.07	0.3511	0.0033		2394	10	2171.7	8.4	1939	16	9.28571
18AK101-57	283.1	1019	0.277821		0.14355	0.00074	6.413	0.054	0.3229	0.0029		2269.5	8.9	2033.1	7.5	1803	14	10.4164
18AK101-58	77.4	209.6	0.369275		0.1205	0.0011	5.799	0.064	0.3473	0.0033		1962	17	1945.2	9.6	1924	17	0.856269
18AK101-59	37.3	174.6	0.213631		0.1599	0.0019	10.7	0.17	0.4836	0.0074		2452	20	2496	15	2542	32	1.76282
18AK101-60	42.9	311	0.137942		0.1379	0.0016	7.87	0.12	0.4126	0.0082		2199	20	2215	14	2225	37	0.722348
18AK101-61	55.3	185	0.298919		0.157	0.0016	10.11	0.2	0.467	0.008		2421	17	2451	16	2468	35	1.22399
18AK101-62	654	1271	0.514555		0.1523	0.0012	6.785	0.068	0.322	0.0033		2371	14	2083	9	1799	16	12.1468
18AK101-63	327	1234	0.264992		0.14618	0.00089	7.157	0.068	0.3548	0.0041		2300	10	2131.1	8.8	1956	20	7.34348
18AK101-64	85.2	426	0.2		0.12601	0.00089	6.118	0.055	0.3508	0.0034		2044	13	1992.1	7.9	1938	16	2.53914
18AK101-65	393	592	0.663851		0.15126	0.0008	8.37	0.1	0.3996	0.0045		2359.3	9	2270	11	2166	21	3.78502
18AK101-66	589	1180	0.499153		0.1588	0.0012	9.8	0.29	0.444	0.011		2443	13	2405	25	2365	48	1.55546
18AK101-67	337.5	893	0.37794		0.15541	0.00081	9.026	0.082	0.4207	0.0039		2406.6	8.6	2340.8	8.5	2263	18	2.73415
18AK101-68	470	864	0.543981		0.1589	0.0011	6.876	0.091	0.3132	0.0042		2443	11	2094	12	1756	21	14.2857
18AK101-69	201	540	0.372222		0.1366	0.0011	7.613	0.083	0.4035	0.0053		2183	14	2185.7	9.8	2184	24	0.12353
Zircon U-Pb isotopes for sample 18AK118
18AK118-01	6.32	28.09	0.224991		0.1216	0.0023	5.71	0.11	0.34	0.0043		1967	34	1931	16	1885	21	1.8302
18AK118-02	11.53	33.7	0.342136		0.1299	0.0022	6.05	0.11	0.337	0.0045		2091	30	1979	15	1871	22	5.35629
18AK118-03	14.83	53.65	0.276421		0.1288	0.0015	6.21	0.1	0.3483	0.004		2078	21	2003	14	1926	19	3.60924
18AK118-04	35.8	99.1	0.361251		0.1242	0.0014	6.005	0.06	0.3509	0.0036		2014	20	1975.4	8.6	1941	17	1.91658
18AK118-05	6.71	25.3	0.265217		0.1247	0.0025	5.95	0.11	0.3453	0.004		2015	36	1964	16	1911	19	2.53102
18AK118-06	19.94	68.8	0.289826		0.122	0.0014	5.829	0.076	0.3456	0.0035		1987	20	1950	12	1913	17	1.8621
18AK118-07	45.4	117.1	0.387703		0.1241	0.0012	5.767	0.068	0.3365	0.0034		2013	17	1940	10	1869	17	3.62643
18AK118-08	14.3	47.2	0.302966		0.1247	0.0019	6.005	0.086	0.3484	0.0036		2020	26	1976	12	1926	17	2.17822
18AK118-09	6.41	26.8	0.239179		0.1205	0.0024	5.73	0.1	0.3444	0.0048		1950	35	1931	16	1906	23	0.974359
18AK118-10	5.42	21.7	0.24977		0.1253	0.0026	5.78	0.14	0.3338	0.005		2018	36	1936	21	1855	24	4.06343
18AK118-11	8.08	31.86	0.25361		0.1338	0.0023	6.13	0.16	0.3322	0.0062		2139	30	1991	22	1852	31	6.91912
18AK118-12	30.19	100	0.3019		0.1231	0.0013	6.117	0.06	0.3608	0.0036		2001	18	1991.4	8.5	1985	17	0.47976
18AK118-13	14.05	46.6	0.301502		0.1217	0.0017	6.098	0.094	0.3626	0.0043		1980	26	1989	14	1997	21	0.452489
18AK118-14	16	57.7	0.277296		0.1222	0.0015	5.852	0.072	0.3471	0.0037		1984	22	1952	11	1920	18	1.6129
18AK118-15	24	83.8	0.286396		0.1217	0.0014	5.996	0.07	0.357	0.0037		1977	20	1974	10	1967	18	0.151745
18AK118-16	10.44	31.38	0.332696		0.1235	0.0023	5.65	0.11	0.3324	0.0045		1995	34	1921	17	1849	22	3.70927
18AK118-17	22.17	67.9	0.32651		0.1225	0.0014	5.99	0.075	0.3535	0.0038		1988	20	1973	11	1951	18	0.754527
18AK118-18	28.9	86.8	0.332949		0.1225	0.0013	6.056	0.068	0.3576	0.0036		1989	18	1982.3	9.9	1972	18	0.336853
18AK118-19	6.13	23.83	0.257239		0.1216	0.0021	6.03	0.11	0.3576	0.0041		1974	31	1979	16	1970	19	0.252653
18AK118-20	39.7	107.3	0.369991		0.1235	0.0012	6.091	0.058	0.3576	0.0037		2005	17	1987.8	8.3	1970	18	0.857855
18AK118-21	25.7	82.5	0.311515		0.1248	0.0016	6.379	0.08	0.3703	0.004		2021	22	2029	11	2030	19	0.394283
18AK118-22	25.29	77.4	0.326744		0.1222	0.0016	6.089	0.075	0.3612	0.0039		1983	23	1987	11	1987	18	0.201309
18AK118-23	41.62	104.9	0.396759		0.1236	0.0012	5.968	0.065	0.3497	0.0035		2005	18	1969.7	9.6	1932	17	1.7606
18AK118-24	13.8	35.7	0.386555		0.1203	0.0019	6.03	0.1	0.3614	0.0047		1963	29	1976	15	1987	22	0.657895
18AK118-25	29.67	67.6	0.438905		0.1217	0.0017	6.031	0.084	0.3587	0.0041		1976	24	1978	12	1975	19	0.101112
18AK118-26	30.08	95.6	0.314644		0.1218	0.0016	6.044	0.084	0.359	0.0046		1979	24	1981	12	1977	22	0.100959
18AK118-27	24.12	80.9	0.298146		0.1212	0.0015	5.663	0.09	0.3387	0.0047		1970	22	1923	14	1879	23	2.38579
18AK118-28	8.15	29.4	0.277211		0.1215	0.0029	6	0.15	0.3576	0.0063		1965	44	1970	22	1969	30	0.253807
18AK118-29	15.37	70.5	0.218014		0.1225	0.0013	6.016	0.08	0.3551	0.0038		1989	19	1976	12	1958	18	0.653595
18AK118-30	33.7	109.8	0.306922		0.1229	0.0013	6.189	0.066	0.3644	0.0037		1995	20	2001.5	9.3	2002	17	0.324756
18AK118-31	18.69	78.4	0.238393		0.1261	0.0015	5.752	0.091	0.3298	0.0041		2039	21	1936	14	1836	20	5.0515
18AK118-32	36.5	98.7	0.369807		0.1253	0.0013	6.011	0.069	0.3465	0.0039		2032	19	1976	10	1917	18	2.75591
18AK118-33	34.4	86.8	0.396313		0.1253	0.0012	5.698	0.073	0.3279	0.0036		2029	18	1929	11	1828	17	4.92854
18AK118-34	128.9	224.7	0.573654		0.12244	0.00094	5.747	0.048	0.34	0.003		1990	14	1937.7	7.2	1886	15	2.62814
18AK118-35	4.05	20.94	0.19341		0.1203	0.0033	5.99	0.15	0.3607	0.0063		1956	47	1976	20	1984	30	1.01215
18AK118-36	23.22	82.2	0.282482		0.1207	0.0014	5.976	0.068	0.3574	0.004		1964	20	1973.2	9.5	1972	20	0.466248
18AK118-37	49.9	97.1	0.513903		0.1243	0.0013	5.85	0.065	0.3396	0.0033		2015	19	1952.4	9.7	1884	16	3.1067
18AK118-38	27.73	90	0.308111		0.1229	0.0012	6.157	0.073	0.3629	0.0034		1995	18	2001	10	1995	16	0.29985
18AK118-39	33.4	88	0.379545		0.1227	0.0014	5.485	0.082	0.3218	0.0039		1992	20	1896	13	1800	20	4.81928
18AK118-40	6.7	21.41	0.312938		0.1228	0.0024	6	0.12	0.3528	0.0047		1988	36	1971	17	1947	22	0.855131
18AK118-41	5.84	22.05	0.264853		0.1207	0.0025	6	0.13	0.3612	0.0057		1954	37	1974	19	1986	27	1.01317
18AK118-42	28.94	82.3	0.35164		0.122	0.0019	6.02	0.082	0.3578	0.0047		1981	27	1978	12	1971	22	0.151439
18AK118-43	20.86	65.7	0.317504		0.1227	0.0015	6.05	0.075	0.3562	0.0034		1991	21	1981	11	1963	16	0.50226
18AK118-44	60.7	122	0.497541		0.1216	0.0016	6.067	0.097	0.3617	0.0065		1976	24	1986	15	1989	31	0.503525
